# Supplementary material
Source: PubMed Central journal article supplement (PMC2881794)

**Supplemental Table 1. Kinetic results of the MPLSM monitoring of the uptake of fluorescent polyunsaturated fatty acids in L-cells.**

| PUFA                    | Cell Region | $C_1$ (pool 1)           | $k_1$ (min <sup>-1</sup> )  | $C_2$ (pool 2)           | $k_2$ (min <sup>-1</sup> )    |
|-------------------------|-------------|--------------------------|-----------------------------|--------------------------|-------------------------------|
| Control L-cells         |             |                          |                             |                          |                               |
| A5c                     | nucleus     | 140 ± 30                 | 0.80 ± 0.10                 | 290 ± 10                 | 0.11 ± 0.02                   |
|                         | nucleoplasm | 127 ± 3                  | 0.48 ± 0.04                 | -                        | -                             |
|                         | nucleus     | 160 ± 40                 | 0.70 ± 0.09                 | 470 ± 20                 | 0.11 ± 0.02                   |
|                         | envelope    | 330 ± 70                 | 0.44 ± 0.04                 | 320 ± 60                 | 0.13 ± 0.02                   |
|                         | cytoplasm   | 290 ± 50                 | 0.48 ± 0.04                 | 310 ± 30                 | 0.11 ± 0.03                   |
| E6c                     | nucleus     | 128 ± 8                  | 2.0 ± 0.4                   | 414 ± 6                  | 0.099 ± 0.006                 |
|                         | nucleoplasm | 69 ± 7                   | 2.24 ± 0.91                 | 199 ± 5                  | 0.11 ± 0.01                   |
|                         | nucleus     | 143 ± 7                  | 1.92 ± 0.31                 | 500 ± 6                  | 0.096 ± 0.005                 |
|                         | envelope    | 220 ± 10                 | 1.7 ± 0.2                   | 810 ± 10                 | 0.094 ± 0.006                 |
|                         | cytoplasm   | 200 ± 10                 | 1.7 ± 0.2                   | 700 ± 10                 | 0.094 ± 0.006                 |
| D7c                     | nucleus     | 313 ± 3                  | 0.503 ± 0.005               | 620 ± 68                 | 0.019 ± 0.003                 |
|                         | nucleoplasm | 249 ± 3                  | 0.29 ± 0.01                 | -                        | -                             |
|                         | nucleus     | 349 ± 3                  | 0.590 ± 0.005               | 670 ± 20                 | 0.029 ± 0.002                 |
|                         | envelope    | 300 ± 20                 | 0.81 ± 0.07                 | 600 ± 70                 | 0.046 ± 0.01                  |
|                         | cytoplasm   | 300 ± 20                 | 0.71 ± 0.05                 | 540 ± 70                 | 0.043 ± 0.01                  |
| L-FABP expressing cells |             |                          |                             |                          |                               |
| A5c                     | nucleus     | 280 ± 50 <sup>**</sup>   | 0.58 ± 0.09                 | 700 ± 60 <sup>****</sup> | 0.06 ± 0.02                   |
|                         | nucleoplasm | -                        | -                           | 364 ± 7 <sup>a</sup>     | 0.143 ± 0.007 <sup>a</sup>    |
|                         | nucleus     | 320 ± 20 <sup>***</sup>  | 0.96 ± 0.09 <sup>*</sup>    | 890 ± 50 <sup>****</sup> | 0.063 ± 0.009 <sup>*</sup>    |
|                         | envelope    | 430 ± 20                 | 0.85 ± 0.05 <sup>****</sup> | 590 ± 20 <sup>****</sup> | 0.07 ± 0.01 <sup>**</sup>     |
|                         | cytoplasm   | 400 ± 20 <sup>*</sup>    | 0.75 ± 0.04 <sup>****</sup> | 600 ± 20 <sup>****</sup> | 0.05 ± 0.01 <sup>*</sup>      |
| E6c                     | nucleus     | 231 ± 6 <sup>****</sup>  | 1.43 ± 0.08                 | 440 ± 80                 | 0.04 ± 0.01 <sup>****</sup>   |
|                         | nucleoplasm | 101 ± 4 <sup>****</sup>  | 1.8 ± 0.2                   | 170 ± 30                 | 0.04 ± 0.01 <sup>****</sup>   |
|                         | nucleus     | 262 ± 6 <sup>****</sup>  | 1.48 ± 0.08                 | 470 ± 60                 | 0.045 ± 0.009 <sup>****</sup> |
|                         | envelope    | 480 ± 10 <sup>****</sup> | 1.6 ± 0.1                   | 1120 ± 70                | 0.040 ± 0.005 <sup>****</sup> |
|                         | cytoplasm   | 425 ± 8 <sup>****</sup>  | 1.57 ± 0.09                 | 940 ± 60 <sup>**</sup>   | 0.040 ± 0.004 <sup>****</sup> |
| D7c                     | nucleus     | 120 ± 10 <sup>****</sup> | 1.6 ± 0.3 <sup>***</sup>    | 650 ± 8                  | 0.129 ± 0.006 <sup>****</sup> |
|                         | nucleoplasm | -                        | -                           | 377 ± 5 <sup>a</sup>     | 0.169 ± 0.006 <sup>a</sup>    |
|                         | nucleus     | 160 ± 10 <sup>****</sup> | 2.1 ± 0.3 <sup>****</sup>   | 700 ± 8                  | 0.123 ± 0.005 <sup>****</sup> |
|                         | envelope    | 300 ± 10                 | 1.4 ± 0.1 <sup>****</sup>   | 850 ± 10 <sup>***</sup>  | 0.106 ± 0.006 <sup>****</sup> |
|                         | cytoplasm   | 260 ± 10                 | 1.4 ± 0.1 <sup>****</sup>   | 810 ± 9 <sup>****</sup>  | 0.108 ± 0.005 <sup>****</sup> |

Values represent fitted parameters ± standard error from 300-500 cells.

\*P< 0.05; \*\* P<0.02; \*\*\*P<0.001, \*\*\*\*P<0.0001

<sup>a</sup>Compared to fitted parameters 1 with 2, P<0.0001

## Supplemental Figure Legends

**Supplemental Fig. 1. Metabolism of the fluorescent E6c and non-fluorescent <sup>14</sup>C-20:5n-3 VLC-PUFA to esterified lipids.** L-cells were incubated with E6c (for 5, 15, 30 minutes and overnight) or non-fluorescent <sup>14</sup>C-20:5n-3 (for 5min and overnight), lipids were extracted, and analyzed as described in the Experimental Procedures. **A.** The amount in nmol/mg protein of fluorescent E6c VLC-PUFA appearing in cholesterol esters (CE), triacylglycerides (TG), free fatty acid (FFA), phosphatidyl ethanolamine (PE), phosphatidyl choline (PC) are shown. **B.** The % distribution of each of the fluorescent E6c lipid classes in A is shown. **C.** The amount in nmol/mg protein of non-fluorescent 20:5n-3 appearing in cholesterol ester (CE), triacylglycerides (TG), free fatty acid (FFA), phosphatic acid (PA), phosphatidyl ethanolamine (PE), phosphoinositol (PI), phosphatidylserine (PS), and phosphatidyl choline (PC) at 5min are shown. **D.** The amount in nmol/mg protein of non-fluorescent 20:5n-3 appearing in each of the lipid classes in C is shown. Values represent the mean  $\pm$  SE (n=4-6).

**Supplemental Fig. 2. Metabolism of the fluorescent D7c and non-fluorescent <sup>14</sup>C-22:6n-3 VLC-PUFA to esterified lipids.** L-cells were incubated with D7c (for 5, 15, 30 minutes and overnight) or non-fluorescent <sup>14</sup>C-22:6n-3 (for 5min and overnight), lipids were extracted, and analyzed as described in the Experimental Procedures. **A.** The amount in nmol/mg protein of fluorescent D7c VLC-PUFA appearing in cholesterol esters (CE), triacylglycerides (TG), free fatty acid (FFA), phosphatidyl ethanolamine (PE), phosphatidyl choline (PC) are shown. **B.** The % distribution of each of the fluorescent D7c lipid classes in A is shown. **C.** The amount in nmol/mg protein of non-fluorescent 22:6n-3 appearing in cholesterol ester (CE), triacylglycerides (TG), free fatty acid (FFA), phosphatic acid (PA), phosphatidyl ethanolamine (PE), phosphoinositol (PI), phosphatidylserine (PS), and phosphatidyl choline (PC) at 5min are shown. **D.** The amount in nmol/mg protein of non-fluorescent 22:6n-3 appearing in each of the lipid classes in C is shown. Values represent the mean  $\pm$  SE (n=4-6).

**Supplemental Fig. 3. Effect of L-FABP expression upon metabolism of the fluorescent and non-fluorescent VLC-PUFA at 5min.** L-cells and L-cells expressing L-FABP were incubated with (Panel A) A5c, E6c, and D7c or with (Panels B,C,D) radiolabeled 20:4n-6, 20:5n-3, and 22:6n-3 for five minutes. The lipids were extracted and analyzed described in the Experimental Procedures. The % distribution of each VLC-PUFA appearing in each of the lipid classes are shown. Values represent the mean  $\pm$  SE (n=4-6). \*, p<0.05; \*\*, p<0.01, significantly different in L-FABP expressing cells (solid bars) compared to control L-cells (open bars).

**Supplemental Fig. 4. Real-time MPLSM of fluorescent n-3 and n-6 VLC-PUFAs in living L-FABP expressing cells at 5 minutes.** MPLSM with non-descanned 2 channel fluorescence emission detection was used to monitor the distribution of the fluorescent n-3 and n-6 VLC-PUFA analogues A5c, E6c, and D7c (2.5  $\mu$ M) in L-FABP expressing cells wherein very little of the PUFA analogues have been metabolized. The PUFA labeled cells (red) were subsequently incubated with 5 $\mu$ M SYTO 11 (green) in order to stain the nuclei (see Experimental Procedures). Images of the distribution of the fluorescent PUFAs, A5c (**A**), E6c (**D**), and D7c (**G**); the corresponding images (**B**), (**E**), and (**H**) show only the SYTO 11 fluorescence distribution in the nuclei; combined images showing the colocalization of A5c with SYTO 11 (**C**), E6c with SYTO 11 (**F**), and D7c with SYTO 11 (**I**).

**Supplemental Fig. 5. The effect of L-FABP expression on the uptake kinetics of the fluorescent PUFAs in living cells.** L-cells expressing L-FABP grown to confluency on chambered coverglass were labeled with 2.5  $\mu$ M A5c, E6c, and D7c and the fluorescent intensities were measured using MPLSM while the cells were maintained at 37 °C during the time course (see Methods) as in the case of the control L-cells. Morphometric analysis of the acquired images was performed in MetaMorph. The emission density was converted to concentration by normalization of whole cell area to 1 and calibration at the 5

minute time point using the direct quantitation by HPLC as described in Experimental Procedures. The uptake curves are shown as follows: **A.** The cytoplasmic and nuclear uptake kinetics of A5c in L-FABP expressing cells, **B.** Nucleoplasmic and nuclear envelope uptake kinetics of A5c in L-FABP expressing cells; **C.** The cytoplasmic and nuclear uptake kinetics of E6c in L-FABP expressing cells, **D.** Nucleoplasmic and nuclear envelope uptake kinetics of E6c in L-FABP expressing cells; **E.** The cytoplasmic and nuclear uptake kinetics of D7c in L-FABP expressing cells, **F.** Nucleoplasmic and nuclear envelope uptake kinetics of D7c in L-FABP expressing cells. Values represent the mean  $\pm$  SE (n=300-500).

Supplemental Figure 1

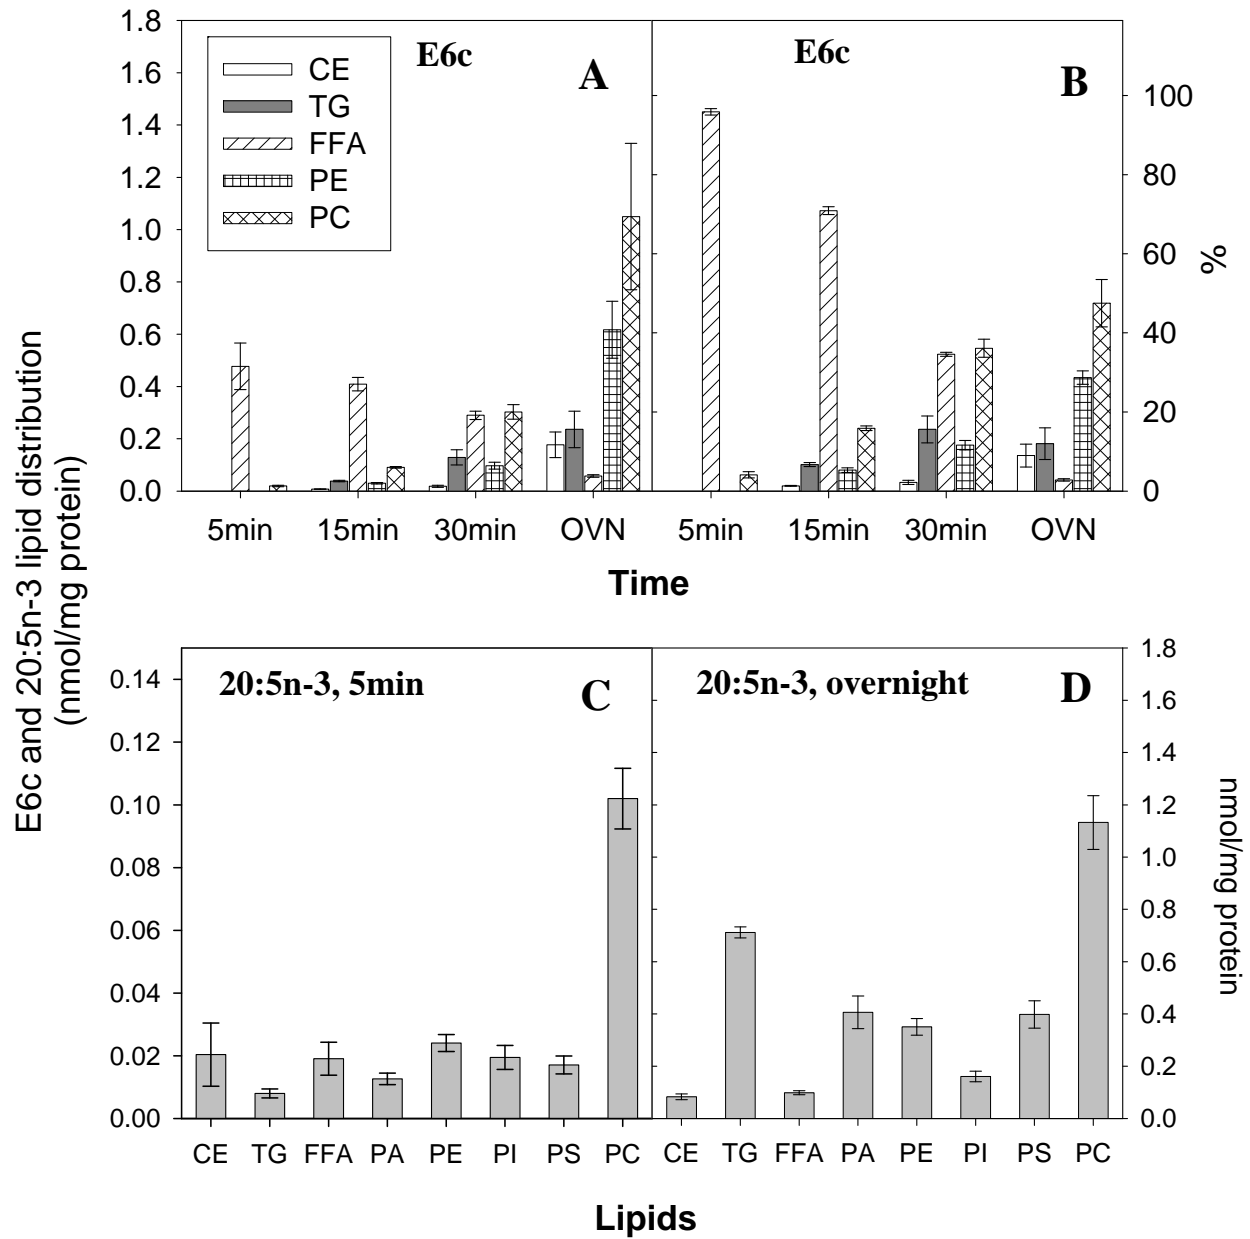

Supplemental Figure 2

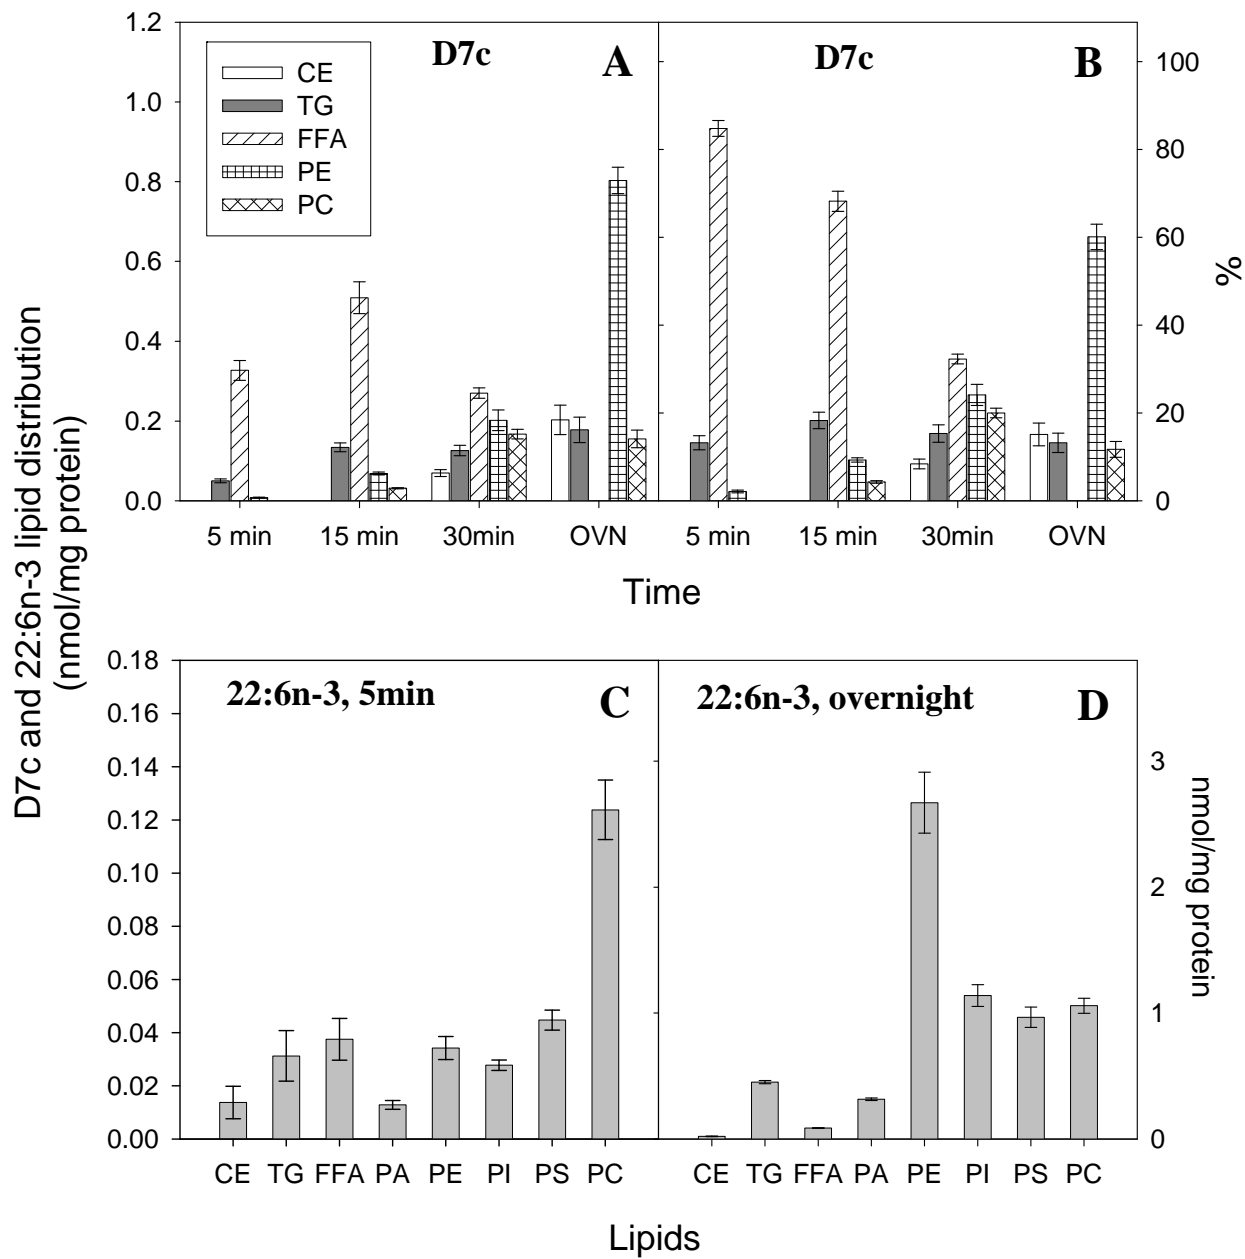

Supplemental Figure 3

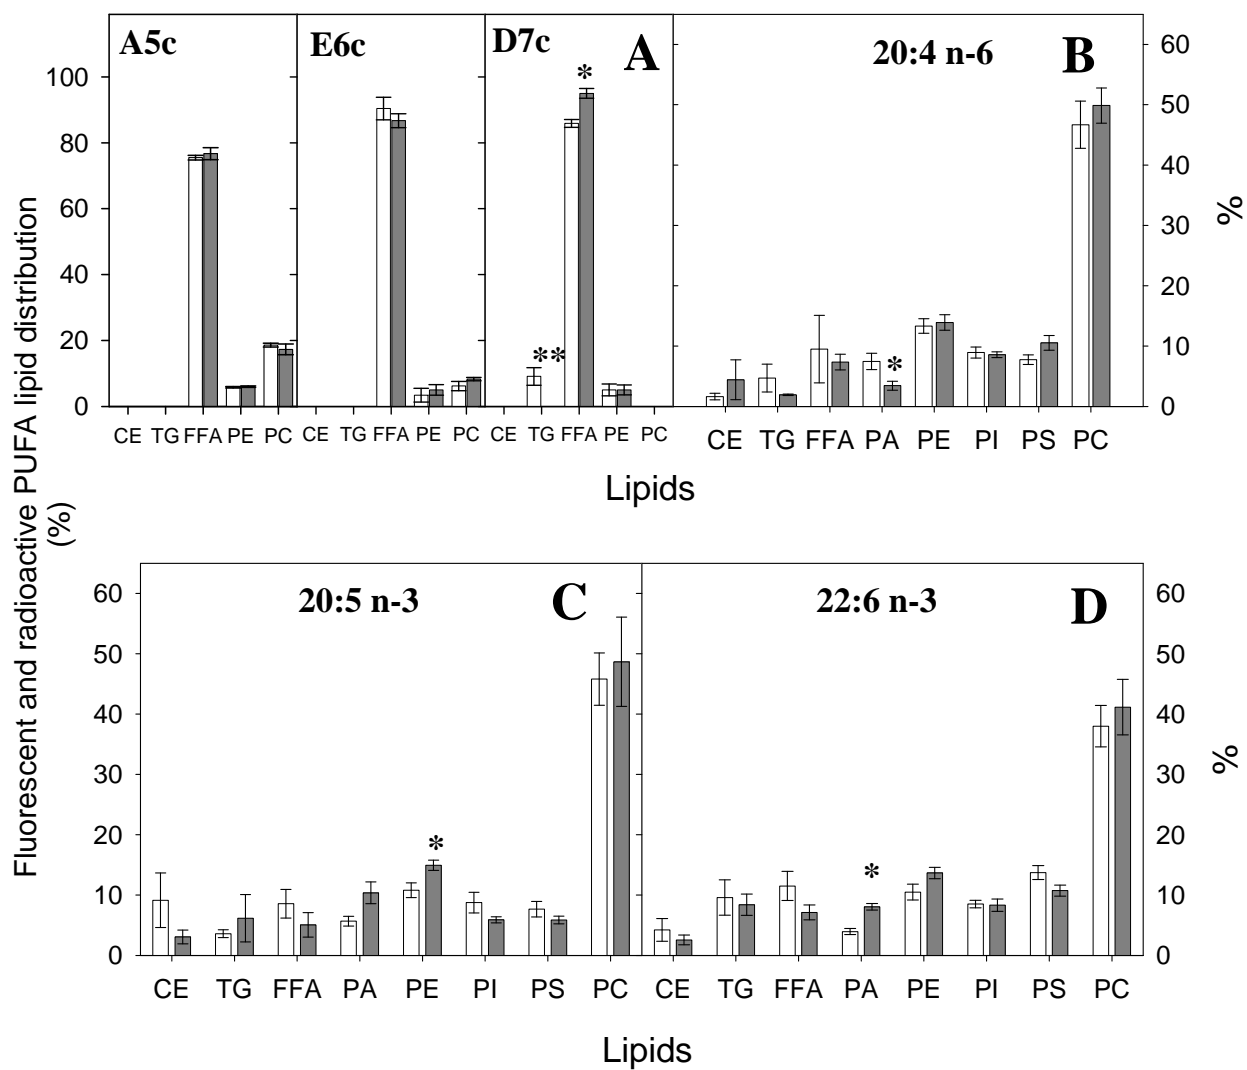

Supplemental Figure 4

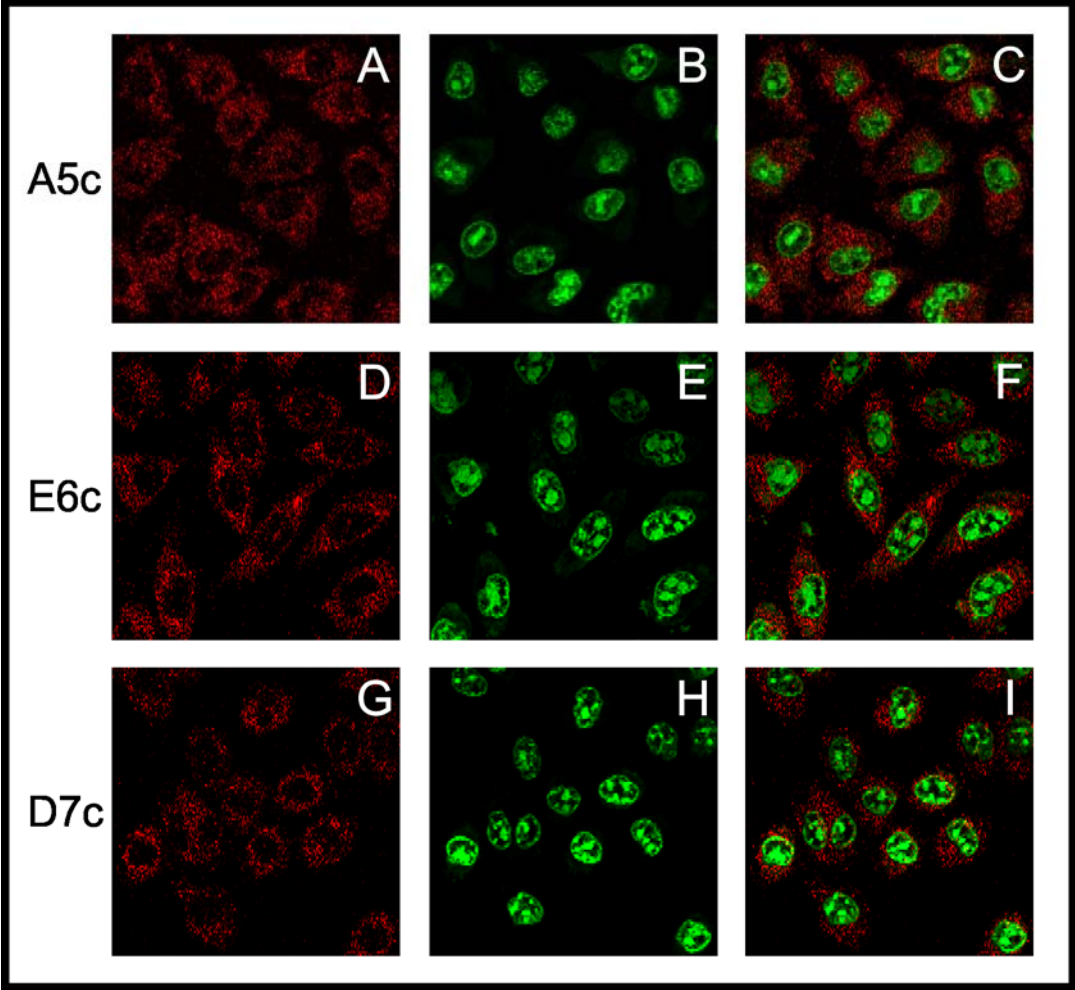

Supplemental Figure 5

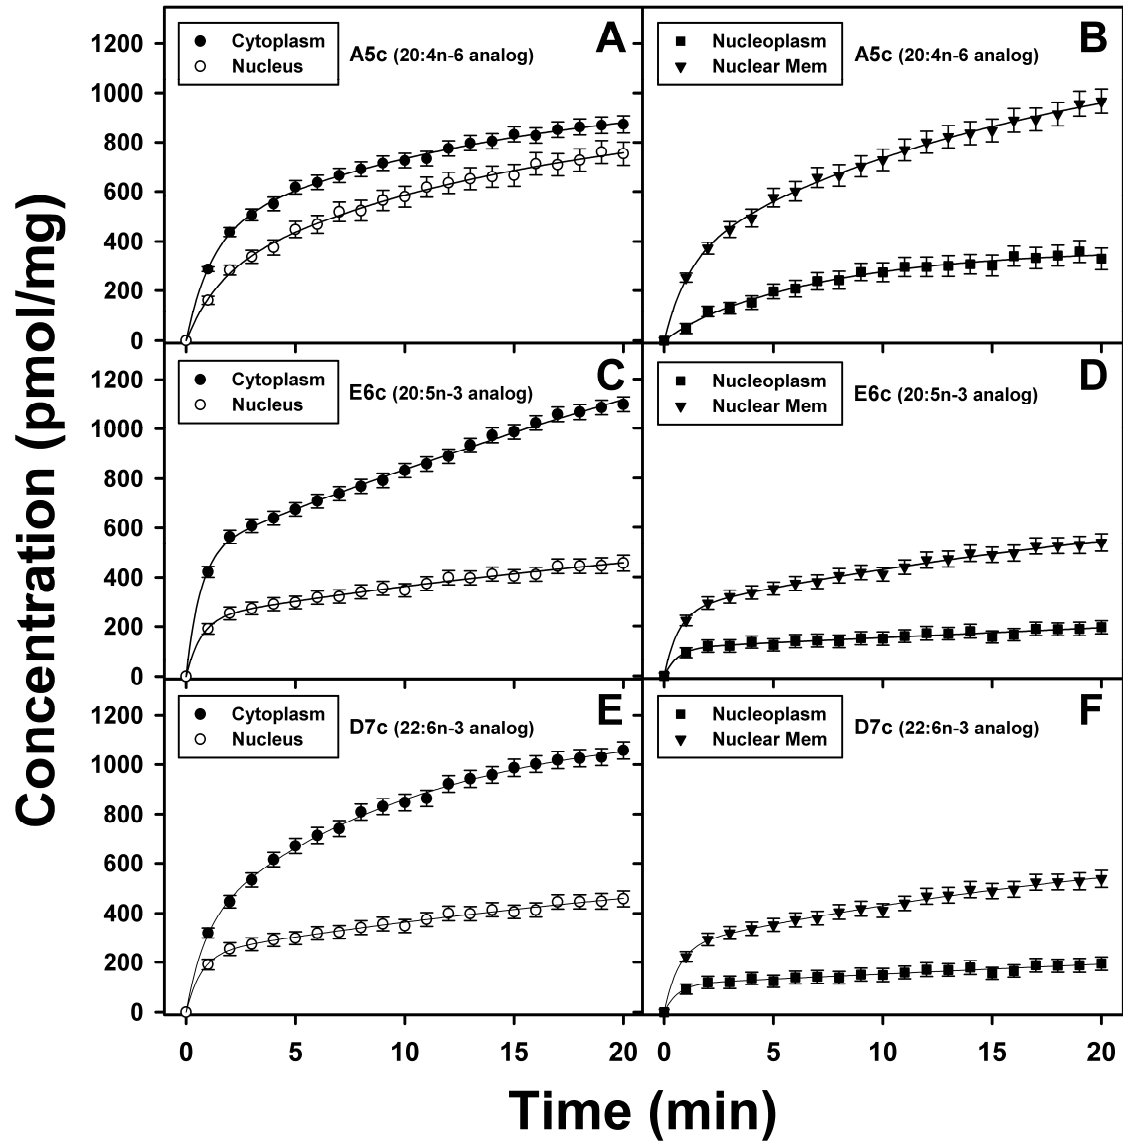

Supplement: supp_M109.079897_jbc.M109.079897-1.pdf [file supp_M109.079897_jbc.M109.079897-1.pdf]
